# Supplementary material for: Stability Studies of Antipseudomonal Beta Lactam Agents for Outpatient Therapy
Source: MDPI journal article supplement (doi:10.3390/pharmaceutics15122705), 2023-11-30
Supplement: s1 [file s1]

Table S1. Chromatographic conditions

| Drug               | Column                                   | Mobile phase A               | Mobile phase B | Gradient                                                                                                                                           | Flow rate (μL/min) | Injection volume (μL) | Total run time (min) |
|--------------------|------------------------------------------|------------------------------|----------------|----------------------------------------------------------------------------------------------------------------------------------------------------|--------------------|-----------------------|----------------------|
| <b>Avibactam</b>   | Kinetex F5 100 Å (2.6 μm, 150 x 2.1 mm)  | 2 mM AmF and 0.1% FA in MQ   | 0.1% FA in ACN | 0-0.2 min: 4% B<br>0.2-3.5 min: gradual increase until 70% B<br>3.5-4.5 min: 70% B<br>4.50-4.51 min: descenso directo a 4% B<br>4.51-7.5 min: 4% B | 300                | 10                    | 7.5                  |
| <b>Aztreonam</b>   | Kinetex F5 100 Å (2.6 μm, 150 x 2.1 mm)  | 2,5 mM AmF and 0.5% FA in MQ | 0.1% FA in ACN | Isocratic elution: 85% mobile phase A and 15% mobile phase B                                                                                       | 300                | 20                    | 3                    |
| <b>Cefepime</b>    | Phenomenex Luna C18 (5 μm, 150 x 2.0 mm) | 2 mM AmF and 0.1% FA in MQ   | 0.1% FA in ACN | 0-0.5 min: 0% B<br>0.5-1.5 min: gradual increase until 50% B<br>1.51-3.5 min: 95% B<br>3.51-6.0 min: 0% B                                          | 500                | 10                    | 6                    |
| <b>Cefiderocol</b> | Kinetex F5 100 Å (2.6 μm, 150 x 2.1 mm)  | 2,5 mM AmF and 0.5% FA in MQ | 0.1% FA in ACN | Isocratic elution: 74% mobile phase A and 26% mobile phase B                                                                                       | 300                | 20                    | 3                    |
| <b>Ceftazidime</b> | Kinetex F5 100 Å (2.6 μm, 150 x 2.1 mm)  | 5 mM AmF and 0.2% FA in MQ   | 0.5% FA in ACN | 0-0.2 min: 4% B<br>0.2-3.5 min: gradual increase until 70% B<br>3.5-4.5 min: 70% B<br>4.50-4.51 min: descenso directo a 4% B<br>4.51-7.5 min: 4% B | 300                | 10                    | 7.5                  |
| <b>Ceftolozane</b> | Phenomenex Luna C18 (5 μm, 150 x 2.0 mm) | 2 mM AmF and 0.1% FA in MQ   | 0.1% FA in ACN | 0-0.5 min: 0% B<br>0.5-1.5 min: gradual increase until 50% B<br>1.51-3.5 min: 95% B<br>3.51-6.0 min: 0% B                                          | 500                | 10                    | 6                    |
| <b>Meropenem</b>   | Phenomenex Luna C18 (5 μm, 150 x 2.0 mm) | 2 mM AmF and 0.1% FA in MQ   | 0.1% FA in ACN | 0-0.5 min: 0% B<br>0.5-1.5 min: gradual increase until 50% B<br>1.51-3.5 min: 95% B                                                                | 500                | 10                    | 6                    |

|                     |                                          |                            |                |                                                                                                           |     |    |   |
|---------------------|------------------------------------------|----------------------------|----------------|-----------------------------------------------------------------------------------------------------------|-----|----|---|
|                     | μm, 150 x 2.0 mm)                        |                            |                | 3.51-6.0 min: 0% B                                                                                        |     |    |   |
| <b>Piperacillin</b> | Phenomenex Luna C18 (5 μm, 150 x 2.0 mm) | 2 mM AmF and 0.1% FA in MQ | 0.1% FA in ACN | 0-0.5 min: 0% B<br>0.5-1.5 min: gradual increase until 50% B<br>1.51-3.5 min: 95% B<br>3.51-6.0 min: 0% B | 500 | 10 | 6 |
| <b>Tazobactam</b>   | Phenomenex Luna C18 (5 μm, 150 x 2.0 mm) | 2 mM AmF and 0.1% FA in MQ | 0.1% FA in ACN | 0-0.5 min: 0% B<br>0.5-1.5 min: gradual increase until 50% B<br>1.51-3.5 min: 95% B<br>3.51-6.0 min: 0% B | 500 | 10 | 6 |
| <b>Vaborbactam</b>  | Pursult XRs C18 (2.8 μm, 100 x 2.0 mm)   | 5 mM AmF and 0.2% FA in MQ | 0.1% FA in ACN | 0-0.5 min: 0% B<br>0.5-1.5 min: gradual increase until 50% B<br>1.51-3.5 min: 95% B<br>3.51-6.0 min: 0% B | 400 | 10 | 6 |

Abbreviations: ACN, acetonitrile; MQ, milli-Q water; AmF, ammonium formate; FA, formic acid.

Table S2. Mass spectrometry conditions

| Drug            | Monitored transitions (m/z) | Ionization mode | Declustering potential (V) | Entrance potential (V) | Collision energy (V) | Cell exit potential (V) |
|-----------------|-----------------------------|-----------------|----------------------------|------------------------|----------------------|-------------------------|
| Avibactam       | 264.001 → 95.900            | Negative        | -80                        | -10                    | -30                  | -6                      |
| Aztreonam       | 433.984 → 121.800           | Negative        | -80                        | -10                    | -42                  | -5                      |
| Cefepime        | 481.047 → 396.000           | Positive        | 56                         | 10                     | 18                   | 10                      |
| Cefiderocol     | 752.138 → 285.200           | Positive        | 101                        | 10                     | 23                   | 8                       |
| Ceftazidime     | 547.100 → 467.900           | Positive        | 66                         | 10                     | 17                   | 10                      |
| Ceftolozane     | 667.040 → 199.100           | Positive        | 23                         | 10                     | 16                   | 10                      |
| Meropenem       | 384.066 → 141.000           | Positive        | 80                         | 10                     | 30                   | 12                      |
| Piperacillin    | 518.199 → 143.200           | Positive        | 101                        | 10                     | 21                   | 12                      |
| Tazobactam      | 168.100 → 100.000           | Positive        | 40                         | 10                     | 20                   | 12                      |
| Vaborbactam     | 295.984 → 234.000           | Negative        | -80                        | -10                    | -30                  | -10                     |
| Ampicillin (IS) | 348.123 → 207.000           | Negative        | -70                        | -10                    | -16                  | -9                      |
| Cefixime (IS)   | 454.083 → 285.000           | Positive        | 101                        | 10                     | 21                   | 8                       |

Abbreviations: IS: internal standard.
